# Supplementary material
Source: publisher figshare collection journal article supplement (https://sage.figshare.com/ndownloader/files/22809827)

**Appendix A**

The evidence of screening results for included studies in the meta-analysis can be found in this link.

<https://1drv.ms/f/s!AoOvg402MxCp1Dt8U1RZdyREnuw9>

*The example of the ERIC search strategy (July 2018)*

Database(s): **ERIC**2000 to July Week 1 2018
Search result screenshot:


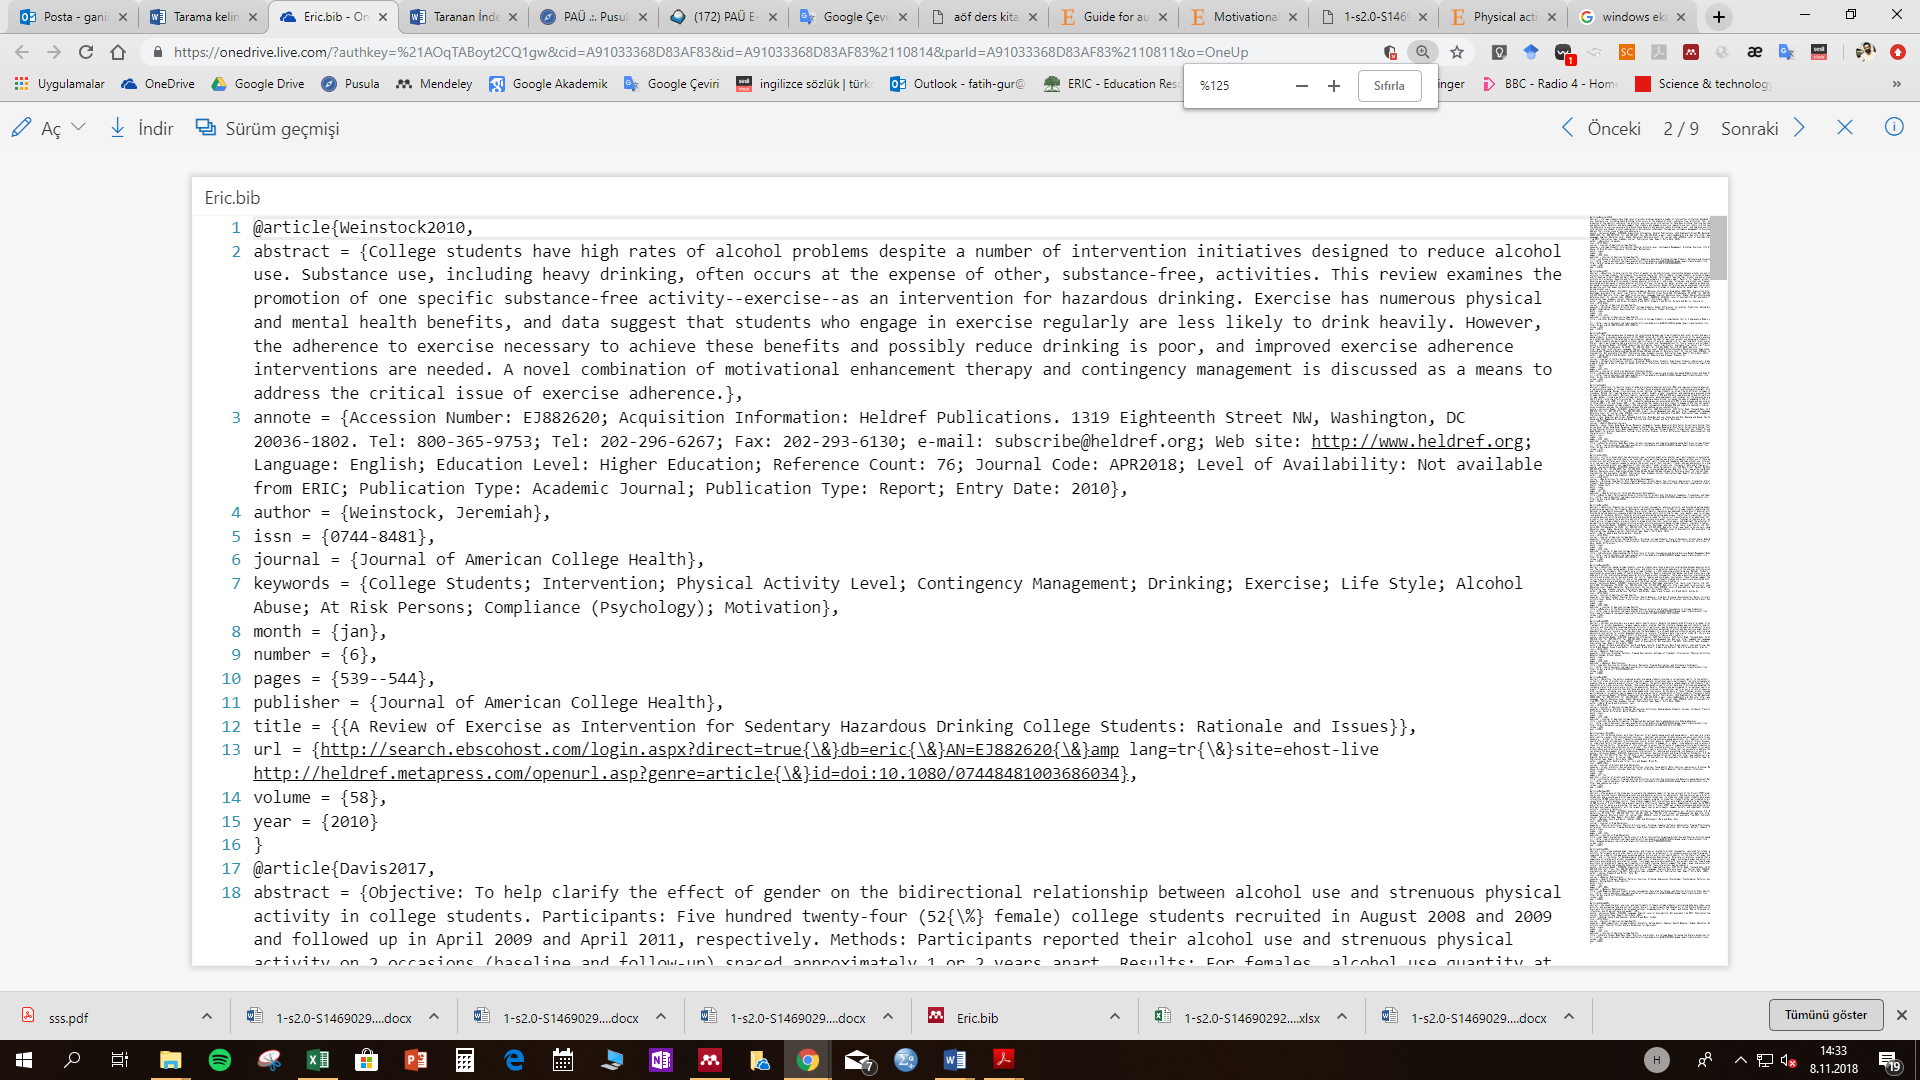

Supplement: Supplementary file 1 [file 22809827]
